# Supplementary material
Source: Springer Nature journal article supplement (https://www.springermedizin.de/resource/supplementary/12876_2012_847_MOESM1_ESM.pdf/9437604)
Supplement: MOESM1 [file 9437604]

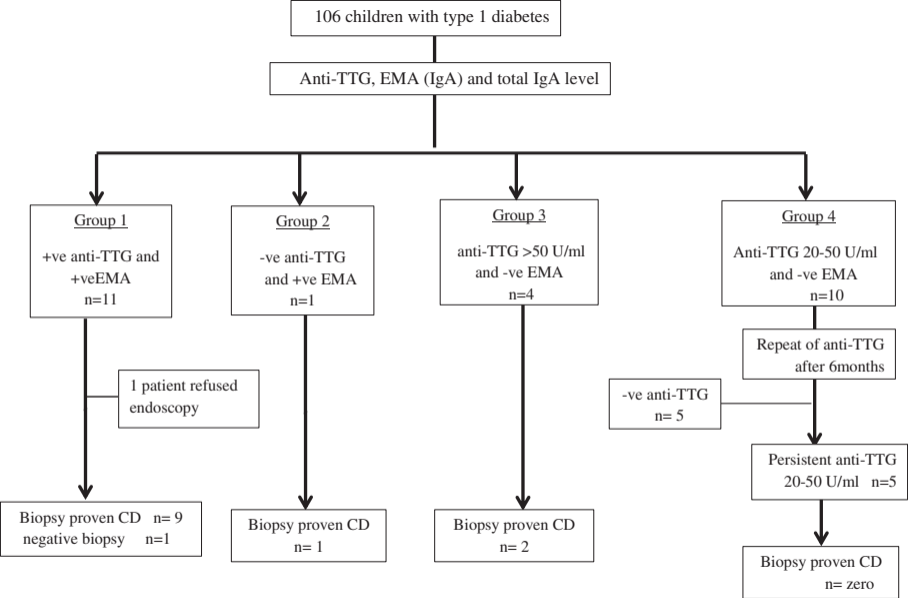

CD= celiac disease; EMA= endomyseal antibody; n= number; Anti-TTG= anti-tissue transglutaminase IgA; -ve= negative; +ve= positive
